## **WEB MATERIAL**

### **Disparities in Coronavirus Disease 2019 Mortality by Country of Birth in Stockholm, Sweden: A Total-Population–Based Cohort Study**

Mikael Rostila, Agneta Cederström, Matthew Wallace, Maria Brandén, Bo Malmberg, and Gunnar Andersson

Table of Contents:

Web Figures 1–3

Web Tables 1–10

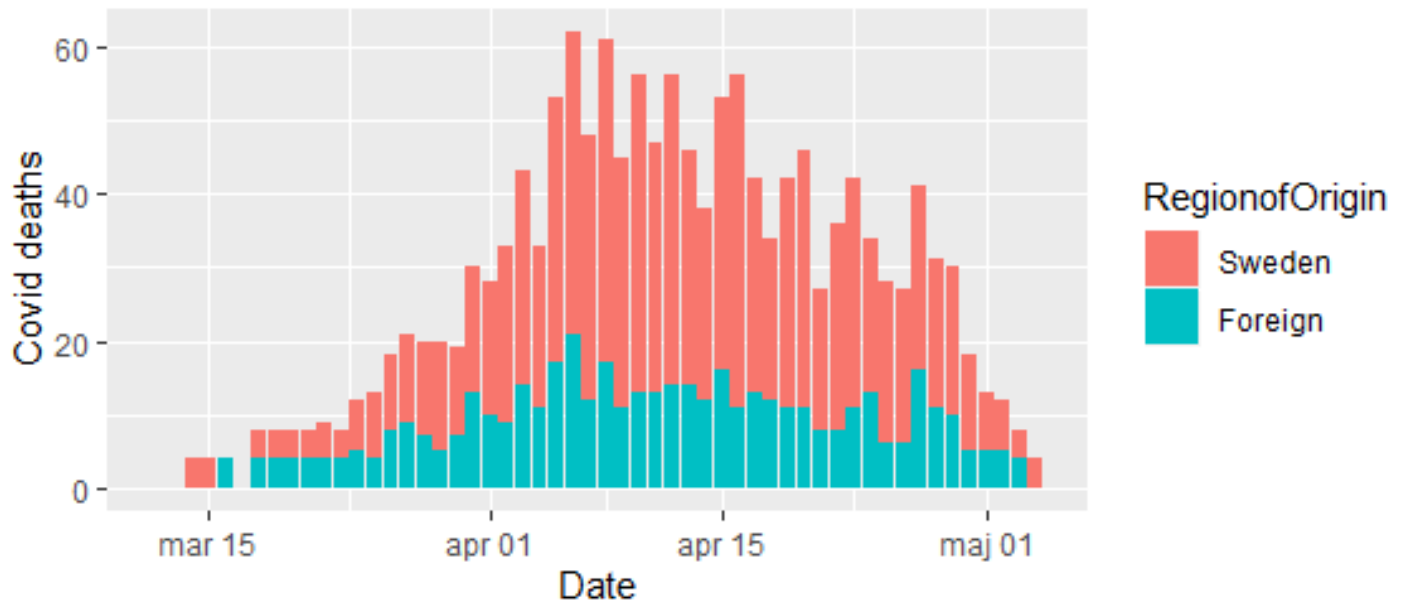

**Web Figure 1.** Distribution of COVID-19 Deaths by Day Between the First Recorded Death in Stockholm County (March 14) and May 4 by Nativity Status.

Footnotes:

- a. Single dates with less than 5 deaths are set to 4 to meet the requirements of our data provider.
- b. Nativity status defined as being born in Sweden vs. being born in any other country.
- c. *Source:* Authors' calculations were based upon Swedish registers from the "Ageing Well" project.

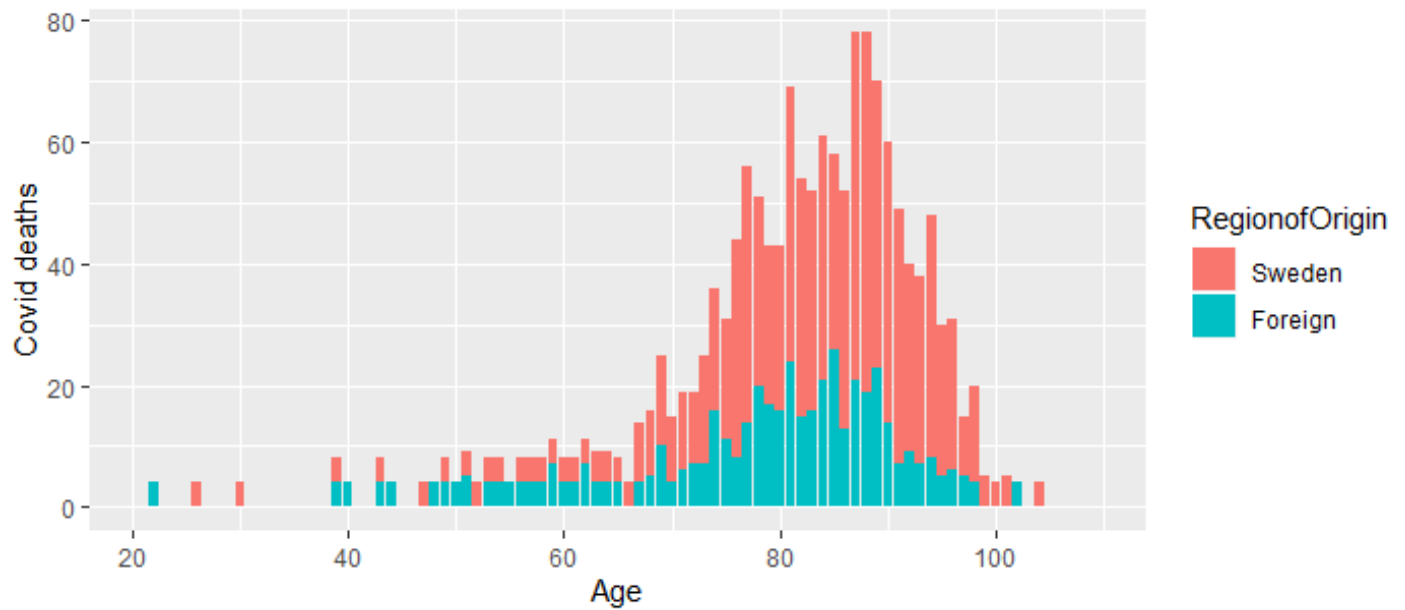

**Web Figure 2.** Distribution of COVID-19 Deaths by Age Between the First Recorded Death in Stockholm County (March 14) and May 4 by Nativity Status.

Footnotes:

- a. Single dates with less than 5 deaths are set to 4 to meet the requirements of our data provider.
- b. Nativity status defined as being born in Sweden vs. being born in any other country.
- c. *Source:* Authors' calculations were based upon Swedish registers from the "Ageing Well" project.

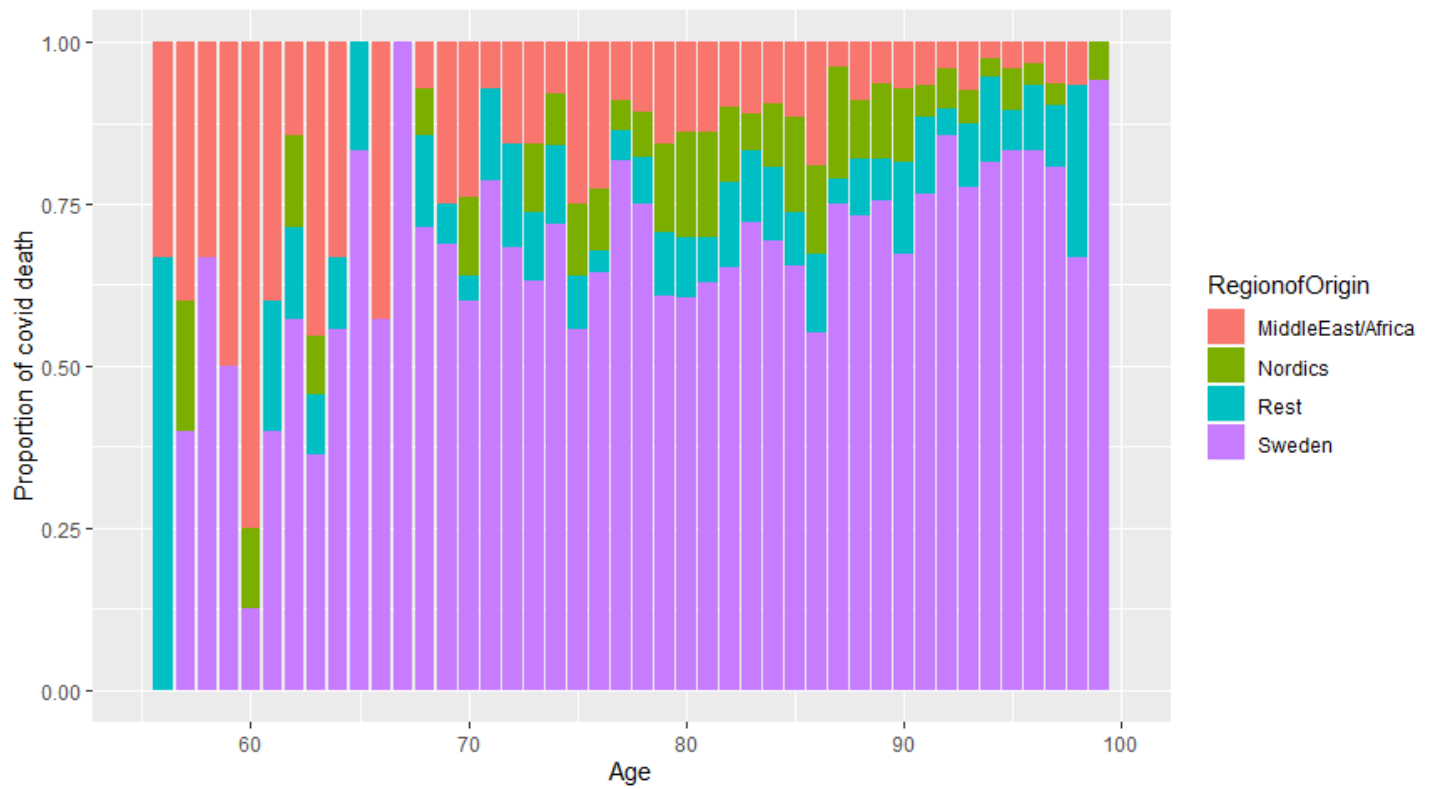

**Web Figure 3.** Proportion of COVID-19 Deaths by Birth Country in Each Age Group in Stockholm County

Footnotes:

- a. *Source:* Authors' calculations were based upon Swedish registers from the "Ageing Well" project.

**Web Table 1.** Proportion of the Excess Relative Risk for COVID-19 Deaths by Birth Country in Stockholm, Sweden (Relative to Swedish-Born), January 31–May 4, 2020, Explained Across Multilevel Poisson Regression Models

| Birth Country   | Model 1 | Model 2 |                                  | Model 3 |                                  | Total Excess Risks Explained Across Models |
|-----------------|---------|---------|----------------------------------|---------|----------------------------------|--------------------------------------------|
|                 | RR      | RR      | Excess Risk Explained by Model 2 | RR      | Excess Risk Explained by Model 3 |                                            |
| <b>Grouped</b>  |         |         |                                  |         |                                  |                                            |
| Other Nordic    | 1.46    | 1.29    | 36%                              | 1.25    | 8%                               | 45%                                        |
| Europe          | 1.03    | 0.94    | 100%                             | 0.91    | -                                | 100%                                       |
| Middle East     | 3.15    | 2.37    | 36%                              | 1.96    | 19%                              | 56%                                        |
| Africa          | 3.04    | 2.40    | 32%                              | 1.70    | 34%                              | 66%                                        |
| Rest of World   | 1.17    | 1.02    | 91%                              | 0.84    | 9%                               | 100%                                       |
| <b>Detailed</b> |         |         |                                  |         |                                  |                                            |
| Baltic States   | 1.33    | 1.29    | 11%                              | 1.38    | -28%                             | -16%                                       |
| Chile           | 1.68    | 1.40    | 41%                              | 0.97    | 59%                              | 100%                                       |
| Finland         | 1.56    | 1.37    | 34%                              | 1.33    | 6%                               | 40%                                        |
| DACH            | 0.84    | 0.80    | -24%                             | 0.89    | 53%                              | 30%                                        |
| Greece          | 1.58    | 1.26    | 56%                              | 0.88    | 44%                              | 100%                                       |
| Iran            | 2.55    | 2.14    | 26%                              | 1.47    | 43%                              | 70%                                        |
| Iraq            | 2.43    | 1.86    | 40%                              | 1.66    | 13%                              | 54%                                        |
| Lebanon         | 5.92    | 4.48    | 29%                              | 4.03    | 9%                               | 38%                                        |
| Norway          | 1.09    | 1.03    | 69%                              | 0.97    | 31%                              | 100%                                       |
| Poland          | 1.11    | 1.02    | 84%                              | 0.92    | 16%                              | 100%                                       |
| Somalia         | 8.88    | 6.74    | 27%                              | 4.35    | 30%                              | 57%                                        |
| Syria           | 4.70    | 3.49    | 33%                              | 2.94    | 15%                              | 48%                                        |
| Turkey          | 3.05    | 2.35    | 34%                              | 1.99    | 17%                              | 52%                                        |

Footnotes:

Abbreviations: DeSO – Demographic Statistical Areas; RR – relative risk.

- DACH includes Germany, Austria, and Switzerland; Baltic States include Estonia, Latvia, and Lithuania; Greece also includes Cyprus.
- Model 1 adjusts for age, sex, and birth country.
- Model 2 additionally adjusts for education level, being employed, and disposable income.
- Model 3 further adjusts for housing type, number of working age individuals in household, and population density at the DeSO level.
- Source:* Authors' calculations were based upon Swedish registers from the “Ageing Well” project.

**Web Table 2.** Multilevel Poisson Regression Models of COVID-19 Deaths in Stockholm, Sweden, January 31–May 4, 2020, Adjusting for Each Predictor Separately With Corresponding % Change in Relative Risk by Birth Country

| Predictor                             | RR       | 95% CI      | P   | % Change | Model                                                | RR       | 95% CI      | P   | % Change |
|---------------------------------------|----------|-------------|-----|----------|------------------------------------------------------|----------|-------------|-----|----------|
| <b>Model 1: Country of birth only</b> |          |             |     |          | <b>Model 5: Housing type</b>                         |          |             |     |          |
| Sweden                                | <b>1</b> |             |     |          | Sweden                                               | <b>1</b> |             |     |          |
| Other Nordic                          | 1.46     | 1.21 , 1.75 | *** | -        | Other Nordic                                         | 1.42     | 1.18 , 1.70 | *** | 2.65     |
| Europe                                | 1.03     | 0.85 , 1.26 |     |          | Europe                                               | 1.05     | 0.86 , 1.29 |     | -1.91    |
| Middle East                           | 3.15     | 2.63 , 3.77 | *** |          | Middle East                                          | 3.26     | 2.71 , 3.91 | *** | -3.38    |
| Africa                                | 3.04     | 2.17 , 4.28 | *** |          | Africa                                               | 3.09     | 2.20 , 4.35 | *** | -1.56    |
| Rest of World                         | 1.17     | 0.83 , 1.66 |     |          | Rest of World                                        | 1.19     | 0.84 , 1.68 |     | -1.31    |
| <b>Model 2: Disposable income</b>     |          |             |     |          | <b>Model 6: No. of working age individuals in HH</b> |          |             |     |          |
| Sweden                                | <b>1</b> |             |     |          | House, apt.                                          | <b>1</b> |             |     |          |
| Other Nordic                          | 1.34     | 1.12 , 1.62 | *** | 7.75     | Other inc. care                                      | 5.15     | 4.51 , 5.89 | *** | -        |
| Europe                                | 0.94     | 0.77 , 1.15 |     | 8.79     | Missing                                              | 0.91     | 0.80 , 1.04 |     | -        |
| Middle East                           | 2.53     | 2.09 , 3.06 | *** | 19.62    | Sweden                                               | <b>1</b> |             |     |          |
| Africa                                | 2.51     | 1.78 , 3.55 | *** | 17.41    | Other Nordic                                         | 1.46     | 1.21 , 1.77 | *** | -0.44    |
| Rest of World                         | 1.01     | 0.71 , 1.43 |     | 14.11    | Europe                                               | 1.07     | 0.87 , 1.31 |     | -2.93    |
| Most                                  | <b>1</b> |             |     |          | Middle East                                          | 3.00     | 2.47 , 3.63 | *** | 4.78     |
| More                                  | 0.89     | 0.68 , 1.17 |     |          | Africa                                               | 2.86     | 2.01 , 4.07 | *** | 5.97     |
| Less                                  | 1.58     | 1.28 , 1.95 | *** |          | Rest of World                                        | 1.12     | 0.78 , 1.61 |     | 4.28     |
| Least                                 | 1.93     | 1.56 , 2.39 | *** |          | 0                                                    | <b>1</b> |             |     |          |
| Missing                               | 0.68     | 0.09 , 4.90 |     |          | 1-2                                                  | 1.22     | 1.04 , 1.43 | **  | -        |
| <b>Model 3: Education level</b>       |          |             |     |          | <b>Model 7: Population density</b>                   |          |             |     |          |
| Sweden                                | <b>1</b> |             |     |          | 3+                                                   | 1.61     | 1.20 , 2.15 | *** | -        |
| Other Nordic                          | 1.37     | 1.14 , 1.65 | *** | 5.68     | Sweden                                               | <b>1</b> |             |     |          |
| Europe                                | 1.02     | 0.83 , 1.25 |     | 1.47     | Other Nordic                                         | 1.43     | 1.18 , 1.74 | *** | 1.75     |
| Middle East                           | 2.88     | 2.35 , 3.52 | *** | 8.53     | Europe                                               | 1.03     | 0.84 , 1.26 |     | 0.54     |
| Africa                                | 2.84     | 2.00 , 4.02 | *** | 6.86     | Middle East                                          | 2.53     | 2.05 , 3.11 | *** | 19.78    |
| Rest of World                         | 1.16     | 0.81 , 1.64 |     | 1.22     | Africa                                               | 2.34     | 1.64 , 3.35 | *** | 23.08    |
| Tertiary                              | <b>1</b> |             |     |          | Rest of World                                        | 1.04     | 0.72 , 1.49 |     | 11.29    |
| Secondary                             | 1.47     | 1.28 , 1.68 | *** |          | Least                                                | <b>1</b> |             |     |          |
| Primary                               | 1.59     | 1.37 , 1.83 | *** |          | Less                                                 | 1.14     | 0.90 , 1.45 |     | -        |
| Missing                               | 1.56     | 1.19 , 2.04 | *** |          | Middle                                               | 1.42     | 1.12 , 1.80 | *** | -        |
| <b>Model 4: Employed</b>              |          |             |     |          | <b>Model 7: Population density</b>                   |          |             |     |          |
| Sweden                                | <b>1</b> |             |     |          | More                                                 | 1.80     | 1.42 , 2.27 | *** | -        |
| Other Nordic                          | 1.39     | 1.15 , 1.66 | *** | 4.91     | Most                                                 | 1.63     | 1.28 , 2.08 | *** | -        |
| Europe                                | 0.99     | 0.81 , 1.21 |     | 4.39     |                                                      |          |             |     |          |
| Middle East                           | 2.79     | 2.33 , 3.35 | *** | 11.27    |                                                      |          |             |     |          |
| Africa                                | 2.74     | 1.95 , 3.86 | *** | 9.85     |                                                      |          |             |     |          |
| Rest of World                         | 1.10     | 0.77 , 1.56 |     | 6.22     |                                                      |          |             |     |          |
| Yes                                   | <b>1</b> |             |     |          |                                                      |          |             |     |          |
| No                                    | 3.12     | 2.53 , 3.86 | *** | -        |                                                      |          |             |     |          |

Footnotes:

Abbreviations: HH – household; RR – relative risk.

RRs significant to  $P < 0.01$  (\*\*\*),  $P < 0.05$  (\*\*), and  $P < 0.10$  (\*).

- a. Age and sex are adjusted in all models.
- b. *Source:* Authors' calculations were based upon Swedish registers from the "Ageing Well" project.

**Web Table 3.** Multilevel Poisson Regression Models for COVID-19 Deaths in Stockholm, Sweden, January 31–May 4, 2020

| Predictor                | Model 1  |                     |     | Model 2  |                   |     | Model 3  |                   |     |
|--------------------------|----------|---------------------|-----|----------|-------------------|-----|----------|-------------------|-----|
|                          | RR       | 95% CI              | P   | RR       | 95% CI            | P   | RR       | 95% CI            | P   |
| <b>Sex</b>               |          |                     |     |          |                   |     |          |                   |     |
| Female                   | <b>1</b> |                     |     | <b>1</b> |                   |     | <b>1</b> |                   |     |
| Male                     | 1.69     | 1.53 , 1.88         | *** | 1.82     | 1.64 , 2.02       | *** | 2.10     | 1.88 , 2.35       | *** |
| <b>Age</b>               |          |                     |     |          |                   |     |          |                   |     |
| 21-39                    | <b>1</b> |                     |     | <b>1</b> |                   |     | <b>1</b> |                   |     |
| 40-49                    | 3.09     | 1.10 , 8.68         | **  | 3.43     | 1.22 , 9.64       | **  | 2.94     | 0.99 , 8.77       | **  |
| 50-59                    | 16.46    | 7.00 , 38.72        | *** | 16.78    | 7.12 , 39.55      | *** | 16.51    | 6.99 , 38.98      | *** |
| 60-64                    | 40.93    | 17.35 , 96.57       | *** | 35.06    | 14.82 , 82.91     | *** | 37.26    | 15.75 , 88.15     | *** |
| 65-69                    | 89.59    | 38.96 , 206.04      | *** | 56.39    | 24.35 , 130.58    | *** | 83.56    | 35.84 , 194.83    | *** |
| 70-74                    | 167.09   | 73.63 , 379.15      | *** | 85.85    | 37.47 , 196.70    | *** | 144.16   | 62.37 , 333.21    | *** |
| 75-79                    | 452.55   | 201.04 , 1 018.73   | *** | 211.80   | 93.06 , 482.03    | *** | 358.51   | 155.86 , 824.65   | *** |
| 80-84                    | 960.58   | 427.51 , 2 158.33   | *** | 414.84   | 182.37 , 943.64   | *** | 655.24   | 284.83 , 1 507.39 | *** |
| 85+                      | 2 430.04 | 1 085.83 , 5 438.35 | *** | 993.07   | 437.84 , 2 252.41 | *** | 1 197.74 | 521.72 , 2 749.72 | *** |
| <b>Country of birth</b>  |          |                     |     |          |                   |     |          |                   |     |
| Sweden                   | <b>1</b> |                     |     | <b>1</b> |                   |     | <b>1</b> |                   |     |
| Other Nordic             | 1.46     | 1.21 , 1.75         | *** | 1.29     | 1.07 , 1.55       | *** | 1.25     | 1.03 , 1.52       | **  |
| Europe                   | 1.03     | 0.85 , 1.26         |     | 0.94     | 0.76 , 1.15       |     | 0.91     | 0.74 , 1.12       |     |
| Middle East              | 3.15     | 2.63 , 3.77         | *** | 2.37     | 1.92 , 2.93       | *** | 1.96     | 1.56 , 2.46       | *** |
| Africa                   | 3.04     | 2.17 , 4.28         | *** | 2.40     | 1.68 , 3.41       | *** | 1.70     | 1.17 , 2.47       | *** |
| Rest of the World        | 1.17     | 0.83 , 1.66         |     | 1.02     | 0.71 , 1.45       |     | 0.84     | 0.58 , 1.22       |     |
| <b>Education level</b>   |          |                     |     |          |                   |     |          |                   |     |
| Post-secondary           |          |                     |     | <b>1</b> |                   |     | <b>1</b> |                   |     |
| Secondary                |          |                     |     | 1.29     | 1.12 , 1.48       | *** | 1.26     | 1.09 , 1.46       | *** |
| Primary                  |          |                     |     | 1.32     | 1.14 , 1.53       | *** | 1.24     | 1.06 , 1.45       | *** |
| Missing                  |          |                     |     | 1.39     | 1.06 , 1.82       | **  | 1.21     | 0.91 , 1.61       |     |
| <b>Disposable Income</b> |          |                     |     |          |                   |     |          |                   |     |
| Q4, Most                 |          |                     |     | <b>1</b> |                   |     | <b>1</b> |                   |     |
| Q3, More                 |          |                     |     | 0.83     | 0.63 , 1.09       |     | 1.03     | 0.77 , 1.37       |     |
| Q2, Less                 |          |                     |     | 1.21     | 0.97 , 1.50       | *   | 1.35     | 1.07 , 1.71       | *** |
| Q1, Least                |          |                     |     | 1.33     | 1.06 , 1.66       | *** | 1.49     | 1.18 , 1.90       | *** |
| Missing                  |          |                     |     | 0.32     | 0.04 , 2.34       |     | 0.42     | 0.06 , 3.21       |     |



|                                  |      |          |   |      |     |          |      |   |      |     |
|----------------------------------|------|----------|---|------|-----|----------|------|---|------|-----|
| <b>Employed</b>                  |      |          |   |      |     |          |      |   |      |     |
| Yes                              |      | <b>1</b> |   |      |     | <b>1</b> |      |   |      |     |
| No                               | 2.67 | 2.15     | , | 3.32 | *** | 2.27     | 1.81 | , | 2.84 | *** |
| <b>Housing type</b>              |      |          |   |      |     |          |      |   |      |     |
| House or apartment               |      |          |   |      |     | <b>1</b> |      |   |      |     |
| Special housing incl. care       |      |          |   |      |     | 5.93     | 5.07 | , | 6.94 | *** |
| Missing                          |      |          |   |      |     | 0.86     | 0.71 | , | 1.03 |     |
| <b>No. working age in HH</b>     |      |          |   |      |     |          |      |   |      |     |
| 0                                |      |          |   |      |     | <b>1</b> |      |   |      |     |
| 1-2                              |      |          |   |      |     | 1.61     | 1.36 | , | 1.90 | *** |
| 3+                               |      |          |   |      |     | 2.32     | 1.72 | , | 3.12 | *** |
| <b>Population density (DeSO)</b> |      |          |   |      |     |          |      |   |      |     |
| Q1, Least                        |      |          |   |      |     | <b>1</b> |      |   |      |     |
| Q2, Less                         |      |          |   |      |     | 1.10     | 0.87 | , | 1.38 |     |
| Q3, Middle                       |      |          |   |      |     | 1.28     | 1.02 | , | 1.61 | **  |
| Q4, More                         |      |          |   |      |     | 1.67     | 1.31 | , | 2.11 | *** |
| Q5, Most                         |      |          |   |      |     | 1.59     | 1.24 | , | 2.04 | *** |

Footnotes:

Abbreviations: CI – confidence interval; DeSO – Demographic Statistical Areas; HH – household; incl. – including; no. – number; RR – relative risk.

RRs significant to  $P < 0.01$  (\*\*\*),  $P < 0.05$  (\*\*), and  $P < 0.10$  (\*).

- a. The relative risks reported in this table are displayed in manuscript Figure 1.
- b. Model 1 adjusts for age, sex, and birth country.
- c. Model 2 additionally adjusts for education level, being employed, and disposable income.
- d. Model 3 further adjusts for housing type, number of working age individuals in household, and population density at the DeSO level.
- e. *Source:* Authors' calculations were based upon Swedish registers from the “Ageing Well” project.

**Web Table 4.** Multilevel Poisson Regression Models for Deaths From All Other Causes in Stockholm, Sweden, January 31–May 4, 2020

| Predictor                | Model 1  |                 |          | Model 2  |                 |          | Model 3  |                 |          |
|--------------------------|----------|-----------------|----------|----------|-----------------|----------|----------|-----------------|----------|
|                          | RR       | 95% CI          | <i>P</i> | RR       | 95% CI          | <i>P</i> | RR       | 95% CI          | <i>P</i> |
| <b>Sex</b>               |          |                 |          |          |                 |          |          |                 |          |
| Female                   | <b>1</b> |                 |          | <b>1</b> |                 |          | <b>1</b> |                 |          |
| Male                     | 1.40     | 1.32 , 1.49     | ***      | 1.50     | 1.41 , 1.59     | ***      | 1.62     | 1.52 , 1.73     | ***      |
| <b>Age</b>               |          |                 |          |          |                 |          |          |                 |          |
| 21-39                    | <b>1</b> |                 |          | <b>1</b> |                 |          | <b>1</b> |                 |          |
| 40-49                    | 1.70     | 1.26 , 2.29     | ***      | 1.95     | 1.44 , 2.64     | ***      | 1.96     | 1.43 , 2.68     | ***      |
| 50-59                    | 5.13     | 4.02 , 6.53     | ***      | 5.46     | 4.27 , 6.96     | ***      | 5.83     | 4.54 , 7.48     | ***      |
| 60-64                    | 11.43    | 8.92 , 14.64    | ***      | 10.42    | 8.12 , 13.38    | ***      | 10.87    | 8.42 , 14.04    | ***      |
| 65-69                    | 18.77    | 14.85 , 23.73   | ***      | 13.02    | 10.23 , 16.57   | ***      | 15.38    | 11.90 , 19.87   | ***      |
| 70-74                    | 32.62    | 26.15 , 40.69   | ***      | 18.68    | 14.83 , 23.54   | ***      | 23.03    | 17.91 , 29.62   | ***      |
| 75-79                    | 55.27    | 44.42 , 68.77   | ***      | 28.94    | 22.99 , 36.43   | ***      | 35.02    | 27.19 , 45.11   | ***      |
| 80-84                    | 110.97   | 89.39 , 137.77  | ***      | 53.81    | 42.78 , 67.70   | ***      | 62.27    | 48.35 , 80.22   | ***      |
| 85+                      | 331.60   | 269.33 , 408.26 | ***      | 151.28   | 121.04 , 189.09 | ***      | 143.36   | 111.88 , 183.70 | ***      |
| <b>Country of birth</b>  |          |                 |          |          |                 |          |          |                 |          |
| Sweden                   | <b>1</b> |                 |          | <b>1</b> |                 |          | <b>1</b> |                 |          |
| Other Nordic             | 1.14     | 1.02 , 1.28     | **       | 1.00     | 0.89 , 1.12     |          | 0.96     | 0.85 , 1.08     |          |
| Europe                   | 0.89     | 0.79 , 1.00     | **       | 0.79     | 0.70 , 0.89     | ***      | 0.80     | 0.70 , 0.90     | ***      |
| Middle East              | 0.92     | 0.78 , 1.09     |          | 0.66     | 0.55 , 0.78     | ***      | 0.66     | 0.55 , 0.79     | ***      |
| Africa                   | 0.92     | 0.68 , 1.24     |          | 0.69     | 0.51 , 0.93     | ***      | 0.65     | 0.48 , 0.89     | ***      |
| Rest of the World        | 0.71     | 0.57 , 0.89     | ***      | 0.59     | 0.47 , 0.74     | ***      | 0.60     | 0.48 , 0.76     | ***      |
| <b>Education level</b>   |          |                 |          |          |                 |          |          |                 |          |
| Post-secondary           |          |                 |          | <b>1</b> |                 |          | <b>1</b> |                 |          |
| Secondary                |          |                 |          | 1.23     | 1.13 , 1.33     | ***      | 1.18     | 1.09 , 1.28     | ***      |
| Primary                  |          |                 |          | 1.45     | 1.33 , 1.59     | ***      | 1.35     | 1.24 , 1.48     | ***      |
| Missing                  |          |                 |          | 1.41     | 1.16 , 1.71     | ***      | 1.34     | 1.10 , 1.63     | ***      |
| <b>Disposable Income</b> |          |                 |          |          |                 |          |          |                 |          |
| Q4, Most                 |          |                 |          | <b>1</b> |                 |          | <b>1</b> |                 |          |
| Q3, More                 |          |                 |          | 1.26     | 1.09 , 1.45     | ***      | 1.37     | 1.18 , 1.58     | ***      |
| Q2, Less                 |          |                 |          | 1.40     | 1.23 , 1.58     | ***      | 1.49     | 1.31 , 1.70     | ***      |
| Q1, Least                |          |                 |          | 1.66     | 1.46 , 1.88     | ***      | 1.76     | 1.54 , 2.01     | ***      |
| Missing                  |          |                 |          | 0.19     | 0.05 , 0.76     | **       | 0.24     | 0.06 , 0.91     | **       |

|                                  |          |      |   |          |          |                 |
|----------------------------------|----------|------|---|----------|----------|-----------------|
| <b>Employed</b>                  |          |      |   |          |          |                 |
| Yes                              | <b>1</b> |      |   |          | <b>1</b> |                 |
| No                               | 2.19     | 1.96 | , | 2.45 *** | 1.94     | 1.73 , 2.18 *** |
| <b>Housing type</b>              |          |      |   |          |          |                 |
| House or apartment               |          |      |   |          | <b>1</b> |                 |
| Special housing incl. care       |          |      |   |          | 3.75     | 3.42 , 4.11 *** |
| Missing                          |          |      |   |          | 0.86     | 0.78 , 0.94 *** |
| <b>No. working age in HH</b>     |          |      |   |          |          |                 |
| 0                                |          |      |   |          | <b>1</b> |                 |
| 1-2                              |          |      |   |          | 1.17     | 1.05 , 1.31 *** |
| 3+                               |          |      |   |          | 1.09     | 0.90 , 1.32     |
| <b>Population density (DeSO)</b> |          |      |   |          |          |                 |
| Q1, Least                        |          |      |   |          | <b>1</b> |                 |
| Q2, Less                         |          |      |   |          | 1.01     | 0.91 , 1.12     |
| Q3, Middle                       |          |      |   |          | 1.05     | 0.94 , 1.17     |
| Q4, More                         |          |      |   |          | 1.09     | 0.97 , 1.22     |
| Q5, Most                         |          |      |   |          | 1.03     | 0.91 , 1.17     |

Footnotes:

Abbreviations: CI – confidence interval; DeSO – Demographic Statistical Areas; HH – household; incl. – including; no. – number; RR – relative risk.

RRs significant to  $P < 0.01$  (\*\*\*),  $P < 0.05$  (\*\*), and  $P < 0.10$  (\*).

- The relative risks reported in this table are displayed in manuscript Figure 1.
- Model 1 adjusts for age, sex, and birth country.
- Model 2 additionally adjusts for education level, being employed, and disposable income.
- Model 3 further adjusts for housing type, number of working age individuals in household, and population density at the DeSO level.
- Source:* Authors' calculations were based upon Swedish registers from the “Ageing Well” project.

**Web Table 5.** Number of Deaths From COVID-19 and All Other Causes, Population Sizes, and Time-at-Risk for Detailed Birth Country in Stockholm, Sweden, January 31–May 4, 2020

| Birth Country | COVID-19 Deaths |            |               | All-Cause Deaths Minus COVID-19 |            |               |
|---------------|-----------------|------------|---------------|---------------------------------|------------|---------------|
|               | Deaths          | Population | Years at Risk | Deaths                          | Population | Years at Risk |
| Baltic States | 14              | 12 540     | 3 189         | 22                              | 12 540     | 3 189         |
| Chile         | 12              | 13 842     | 3 521         | 23                              | 13 842     | 3 521         |
| Finland       | 111             | 47 079     | 11 945        | 278                             | 47 079     | 11 945        |
| DACH          | 23              | 14 565     | 3 697         | 76                              | 14 565     | 3 697         |
| Greece        | 11              | 8 737      | 2 222         | 14                              | 8 737      | 2 222         |
| Iran          | 27              | 28 236     | 7 185         | 32                              | 28 236     | 7 185         |
| Iraq          | 29              | 41 054     | 10 446        | 44                              | 41 054     | 10 446        |
| Lebanon       | 13              | 6 289      | 1 600         | 7                               | 6 289      | 1 600         |
| Norway        | 11              | 6 251      | 1 588         | 28                              | 6 251      | 1 588         |
| Poland        | 12              | 32 436     | 8 253         | 38                              | 32 436     | 8 253         |
| Somalia       | 19              | 10 522     | 2 676         | 12                              | 10 522     | 2 676         |
| Sweden        | 1 016           | 1 232 511  | 313 336       | 3 313                           | 1 232 511  | 313 336       |
| Syria         | 34              | 24 349     | 6 194         | 32                              | 24 349     | 6 194         |
| Turkey        | 31              | 22 915     | 5 828         | 33                              | 22 915     | 5 828         |

Footnotes:

- a. We only show the countries of origin that recorded at least 10 covid-19 deaths between 31 Jan and 4 May 2020.
- b. DACH includes Germany, Austria, and Switzerland; Baltic States include Estonia, Latvia, and Lithuania; Greece also includes Cyprus.
- c. *Source:* Authors' calculations were based upon Swedish registers from the "Ageing Well" project.

**Web Table 6.** Multilevel Poisson Regression Models for COVID-19 Deaths in Stockholm, Sweden, January 31–May 4, 2020, According to Detailed Birth Country

| Birth Country | Model 1  |              |          | Model 2  |              |          | Model 3  |             |          |
|---------------|----------|--------------|----------|----------|--------------|----------|----------|-------------|----------|
|               | RR       | 95% CI       | <i>P</i> | RR       | 95% CI       | <i>P</i> | RR       | 95% CI      | <i>P</i> |
| Sweden        | <b>1</b> |              |          | <b>1</b> |              |          | <b>1</b> |             |          |
| Baltic States | 1.33     | 0.78 , 2.26  |          | 1.29     | 0.76 , 2.19  |          | 1.38     | 0.80 , 2.39 |          |
| Chile         | 1.68     | 0.95 , 2.97  | *        | 1.40     | 0.79 , 2.48  |          | 0.97     | 0.50 , 1.86 |          |
| Finland       | 1.56     | 1.28 , 1.89  | ***      | 1.37     | 1.12 , 1.67  | ***      | 1.33     | 1.08 , 1.65 | ***      |
| DACH          | 0.84     | 0.56 , 1.27  |          | 0.80     | 0.53 , 1.22  |          | 0.89     | 0.57 , 1.38 |          |
| Greece        | 1.58     | 0.87 , 2.87  |          | 1.26     | 0.69 , 2.29  |          | 0.88     | 0.46 , 1.72 |          |
| Iran          | 2.55     | 1.74 , 3.74  | ***      | 2.14     | 1.45 , 3.17  | ***      | 1.47     | 0.92 , 2.34 | ***      |
| Iraq          | 2.43     | 1.68 , 3.52  | ***      | 1.86     | 1.25 , 2.77  | ***      | 1.66     | 1.09 , 2.54 | **       |
| Lebanon       | 5.92     | 3.42 , 10.24 | ***      | 4.48     | 2.58 , 7.80  | ***      | 4.03     | 2.24 , 7.25 | ***      |
| Norway        | 1.09     | 0.60 , 1.97  |          | 1.03     | 0.57 , 1.86  |          | 0.97     | 0.50 , 1.85 |          |
| Poland        | 1.11     | 0.63 , 1.96  |          | 1.02     | 0.57 , 1.80  |          | 0.92     | 0.51 , 1.68 |          |
| Somalia       | 8.88     | 5.63 , 13.99 | ***      | 6.74     | 4.14 , 10.94 | ***      | 4.35     | 2.51 , 7.52 | ***      |
| Syria         | 4.70     | 3.34 , 6.62  | ***      | 3.49     | 2.42 , 5.03  | ***      | 2.94     | 1.97 , 4.39 | ***      |
| Turkey        | 3.05     | 2.14 , 4.37  | ***      | 2.35     | 1.62 , 3.40  | ***      | 1.99     | 1.33 , 2.98 | ***      |

Footnotes:

Abbreviations: CI – confidence interval; RR – relative risk.

R Rs significant to  $P < 0.01$  (\*\*\*),  $P < 0.05$  (\*\*), and  $P < 0.10$  (\*).

- The relative risks reported in this table are displayed in manuscript Figure 2.
- We only show the countries of origin that recorded at least 10 covid-19 deaths between 31 Jan and 4 May 2020.
- DACH includes Germany, Austria, and Switzerland; Baltic States include Estonia, Latvia, and Lithuania; Greece also includes Cyprus.
- Model 1 adjusts for age, sex, and birth country.
- Model 2 additionally adjusts for education level, being employed, and disposable income.
- Model 3 further adjusts for housing type, number of working age individuals in household, and population density at the DeSO level.
- We do not show the specific RRs for the other predictors in this table because the values are similar to those shown in the online Web Table 1.
- Source:* Authors' calculations were based upon Swedish registers from the “Ageing Well” project.

**Web Table 7.** Multilevel Poisson Regression Models for Deaths From all Other Causes (Minus COVID-19) in Stockholm, Sweden, January 31–May 4, 2020, According to Detailed Birth Country

| Birth Country   | Model 1  |             |          | Model 2  |             |          | Model 3  |             |          |
|-----------------|----------|-------------|----------|----------|-------------|----------|----------|-------------|----------|
|                 | RR       | 95% CI      | <i>P</i> | RR       | 95% CI      | <i>P</i> | RR       | 95% CI      | <i>P</i> |
| Sweden          | <b>1</b> |             |          | <b>1</b> |             |          | <b>1</b> |             |          |
| Baltic States   | 0.68     | 0.45 , 1.04 | *        | 0.65     | 0.43 , 0.99 | **       | 0.69     | 0.45 , 1.06 | *        |
| Chile           | 0.88     | 0.58 , 1.32 |          | 0.69     | 0.46 , 1.04 | *        | 0.67     | 0.44 , 1.02 | *        |
| Finland         | 1.21     | 1.07 , 1.37 | ***      | 1.04     | 0.92 , 1.18 |          | 1.00     | 0.88 , 1.14 |          |
| Germanic States | 0.93     | 0.74 , 1.17 |          | 0.90     | 0.72 , 1.13 |          | 0.96     | 0.76 , 1.22 |          |
| Greece & Cyprus | 0.62     | 0.37 , 1.05 | *        | 0.46     | 0.27 , 0.77 | ***      | 0.48     | 0.28 , 0.81 | ***      |
| Iran            | 0.79     | 0.56 , 1.13 |          | 0.64     | 0.45 , 0.90 | ***      | 0.61     | 0.42 , 0.88 | ***      |
| Iraq            | 0.96     | 0.71 , 1.30 |          | 0.67     | 0.49 , 0.91 | ***      | 0.67     | 0.48 , 0.92 | ***      |
| Lebanon         | 0.84     | 0.40 , 1.77 |          | 0.58     | 0.27 , 1.22 |          | 0.61     | 0.29 , 1.30 |          |
| Norway          | 0.89     | 0.61 , 1.29 |          | 0.84     | 0.58 , 1.21 |          | 0.81     | 0.55 , 1.20 |          |
| Poland          | 0.91     | 0.66 , 1.26 |          | 0.80     | 0.58 , 1.10 |          | 0.77     | 0.55 , 1.08 |          |
| Somalia         | 1.39     | 0.79 , 2.45 |          | 0.93     | 0.52 , 1.65 |          | 0.99     | 0.55 , 1.77 |          |
| Syria           | 1.17     | 0.83 , 1.66 |          | 0.77     | 0.54 , 1.10 |          | 0.77     | 0.53 , 1.10 |          |
| Turkey          | 0.90     | 0.64 , 1.27 |          | 0.62     | 0.44 , 0.87 | ***      | 0.65     | 0.45 , 0.92 | **       |

Footnotes:

Abbreviations: CI – confidence interval; RR – relative risk.

RRs significant to  $P < 0.01$  (\*\*\*),  $P < 0.05$  (\*\*), and  $P < 0.10$  (\*).

- The relative risks reported in this table are displayed in manuscript Figure 2.
- We only show the countries of origin that recorded at least 10 covid-19 deaths between 31 Jan and 4 May 2020.
- DACH includes Germany, Austria, and Switzerland; Baltic States include Estonia, Latvia, and Lithuania; Greece also includes Cyprus.
- Model 1 adjusts for age, sex, and birth country.
- Model 2 additionally adjusts for education level, being employed, and disposable income.
- Model 3 further adjusts for housing type, number of working age individuals in household, and population density at the DeSO level.
- We do not show the specific RRs for the other predictors in this table because the values are similar to those shown in the online Web Table 2.
- Source:* Authors’ calculations were based upon Swedish registers from the “Ageing Well” project.

**Web Table 8.** Multilevel Poisson Regression Models for COVID-19 Deaths in all of Sweden, January 31–May 4, 2020, Including a Region of Residence by Birth Country Interaction Term

| Region of Residence by Birth Country | Model 1  |              |     | Model 2  |              |     | Model 3  |             |     |
|--------------------------------------|----------|--------------|-----|----------|--------------|-----|----------|-------------|-----|
|                                      | RR       | 95% CI       | P   | RR       | 95% CI       | P   | RR       | 95% CI      | P   |
| <b>Stockholm</b>                     |          |              |     |          |              |     |          |             |     |
| Sweden                               | <b>1</b> |              |     | <b>1</b> |              |     | <b>1</b> |             |     |
| Other Nordic                         | 1.46     | 1.21 , 1.75  | *** | 1.29     | 1.08 , 1.55  | *** | 1.27     | 1.05 , 1.54 | *** |
| Europe                               | 1.04     | 0.85 , 1.26  |     | 0.96     | 0.78 , 1.17  |     | 0.96     | 0.78 , 1.18 |     |
| Middle East                          | 3.13     | 2.61 , 3.75  | *** | 2.35     | 1.93 , 2.88  | *** | 2.10     | 1.71 , 2.59 | *** |
| Africa                               | 3.00     | 2.14 , 4.21  | *** | 2.41     | 1.70 , 3.41  | *** | 1.96     | 1.37 , 2.80 | *** |
| Rest of the World                    | 1.16     | 0.82 , 1.64  |     | 1.06     | 0.75 , 1.50  |     | 0.91     | 0.63 , 1.31 |     |
| <b>Rest of Sweden</b>                |          |              |     |          |              |     |          |             |     |
| Sweden                               | <b>1</b> |              |     | <b>1</b> |              |     | <b>1</b> |             |     |
| Other Nordic                         | 1.29     | 1.02 , 1.63  | **  | 1.19     | 0.94 , 1.51  |     | 1.10     | 0.86 , 1.42 |     |
| Europe                               | 1.20     | 0.93 , 1.54  |     | 1.12     | 0.87 , 1.44  |     | 1.07     | 0.82 , 1.39 |     |
| Middle East                          | 3.75     | 2.79 , 5.02  | *** | 2.85     | 2.10 , 3.87  | *** | 2.58     | 1.89 , 3.53 | *** |
| Africa                               | 8.46     | 5.63 , 12.70 | *** | 6.72     | 4.44 , 10.18 | *** | 5.58     | 3.64 , 8.56 | *** |
| Rest of the World                    | 1.52     | 0.90 , 2.58  |     | 1.43     | 0.84 , 2.43  |     | 1.31     | 0.75 , 2.27 |     |

Footnotes:

Abbreviations: CI – confidence interval; RR – relative risk.  
RRs significant to  $P < 0.01$  (\*\*\*),  $P < 0.05$  (\*\*), and  $P < 0.10$  (\*).

- Model 1 adjusts for age, sex, and birth country.
- Model 2 additionally adjusts for education level, being employed, and disposable income.
- Model 3 further adjusts for housing type, number of working age individuals in household, and population density at the DeSO level.
- We do not show the specific RRs for the other predictors in this table because they are similar to those shown in Web Table 1.
- Source:* Authors' calculations were based upon Swedish registers from the “Ageing Well” project.

**Web Table 9.** Multilevel Poisson Regression Models for COVID-19 Deaths in Stockholm, Sweden, January 31–May 4, 2020, Including a sex by Birth Country Interaction Term

| Sex by Birth Country | Model 1  |             |     | Model 2  |             |     | Model 3  |             |     |
|----------------------|----------|-------------|-----|----------|-------------|-----|----------|-------------|-----|
|                      | RR       | 95% CI      | P   | RR       | 95% CI      | P   | RR       | 95% CI      | P   |
| <b>Women</b>         |          |             |     |          |             |     |          |             |     |
| Sweden               | <b>1</b> |             |     | <b>1</b> |             |     | <b>1</b> |             |     |
| Other Nordic         | 1.37     | 1.08 , 1.75 | *** | 1.26     | 0.99 , 1.61 | *   | 1.28     | 0.99 , 1.65 | *   |
| Europe               | 0.85     | 0.62 , 1.16 |     | 0.80     | 0.58 , 1.10 |     | 0.79     | 0.57 , 1.10 |     |
| Middle East          | 2.71     | 2.04 , 3.61 | *** | 2.04     | 1.49 , 2.79 | *** | 1.75     | 1.24 , 2.47 | *** |
| Africa               | 2.10     | 1.09 , 4.07 | **  | 1.64     | 0.83 , 3.22 |     | 1.39     | 0.69 , 2.78 |     |
| Rest of the World    | 0.91     | 0.51 , 1.61 |     | 0.83     | 0.47 , 1.49 |     | 0.66     | 0.35 , 1.25 |     |
| <b>Men</b>           |          |             |     |          |             |     |          |             |     |
| Sweden               | <b>1</b> |             |     | <b>1</b> |             |     | <b>1</b> |             |     |
| Other Nordic         | 1.55     | 1.17 , 2.04 | *** | 1.32     | 1.00 , 1.74 | *   | 1.20     | 0.89 , 1.61 |     |
| Europe               | 1.21     | 0.93 , 1.57 |     | 1.09     | 0.84 , 1.42 |     | 1.00     | 0.77 , 1.31 |     |
| Middle East          | 3.53     | 2.79 , 4.45 | *** | 2.63     | 2.03 , 3.40 | *** | 2.08     | 1.59 , 2.72 | *** |
| Africa               | 3.66     | 2.46 , 5.45 | *** | 2.95     | 1.97 , 4.42 | *** | 1.91     | 1.25 , 2.91 | *** |
| Rest of the World    | 1.41     | 0.91 , 2.18 |     | 1.25     | 0.80 , 1.94 |     | 0.98     | 0.63 , 1.54 |     |

Footnotes:

Abbreviations: CI – confidence interval; RR – relative risk.  
RRs significant to  $P < 0.01$  (\*\*\*),  $P < 0.05$  (\*\*), and  $P < 0.10$  (\*).

- Model 1 adjusts for age, sex, and birth country.
- Model 2 additionally adjusts for education level, being employed, and disposable income.
- Model 3 further adjusts for housing type, number of working age individuals in household, and population density at the DeSO level.
- We do not show the specific RRs for the other predictors because the values are similar to those shown in Web Table 1.
- Source:* Authors' calculations were based upon Swedish registers from the “Ageing Well” project.



**Web Table 10.** Multilevel Poisson Regression Models for COVID-19 Deaths in Stockholm, Sweden, January 31–May 4, 2020, Stratified by Ages 65 and Under and 66 and Over

| Age<br>by Birth Country | Model 1  |              |     | Model 2  |             |     | Model 3  |             |     |
|-------------------------|----------|--------------|-----|----------|-------------|-----|----------|-------------|-----|
|                         | RR       | 95% CI       | P   | RR       | 95% CI      | P   | RR       | 95% CI      | P   |
| <b>65 and under</b>     |          |              |     |          |             |     |          |             |     |
| Sweden                  | <b>1</b> |              |     | <b>1</b> |             |     | <b>1</b> |             |     |
| Other Nordic            | 2.43     | 1.03 , 5.72  | **  | 1.77     | 0.75 , 4.17 |     | 2.07     | 0.87 , 4.92 |     |
| Europe                  | 1.55     | 0.73 , 3.30  |     | 0.88     | 0.40 , 1.95 |     | 0.99     | 0.44 , 2.23 |     |
| Middle East             | 3.37     | 1.97 , 5.76  | *** | 1.86     | 1.06 , 3.28 | **  | 1.91     | 1.06 , 3.46 | **  |
| Africa                  | 5.43     | 2.87 , 10.29 | *** | 3.05     | 1.58 , 5.89 | *** | 2.71     | 1.33 , 5.53 | *** |
| Rest of the World       | 1.85     | 0.84 , 4.12  |     | 1.20     | 0.53 , 2.72 |     | 1.23     | 0.53 , 2.85 |     |
| <b>66 and over</b>      |          |              |     |          |             |     |          |             |     |
| Sweden                  | <b>1</b> |              |     | <b>1</b> |             |     | <b>1</b> |             |     |
| Other Nordic            | 1.42     | 1.18 , 1.71  | *** | 1.28     | 1.06 , 1.54 | *** | 1.22     | 1.00 , 1.49 | **  |
| Europe                  | 1.01     | 0.82 , 1.24  |     | 0.94     | 0.76 , 1.16 |     | 0.91     | 0.73 , 1.12 |     |
| Middle East             | 3.16     | 2.60 , 3.83  | *** | 2.53     | 2.02 , 3.18 | *** | 2.01     | 1.57 , 2.58 | *** |
| Africa                  | 2.55     | 1.68 , 3.85  | *** | 2.13     | 1.39 , 3.27 | *** | 1.54     | 0.99 , 2.40 | *   |
| Rest of the World       | 1.09     | 0.74 , 1.61  |     | 0.98     | 0.66 , 1.46 |     | 0.79     | 0.52 , 1.20 |     |

Footnotes:

Abbreviations: CI – confidence interval; DeSO – Demographic Statistical Areas; RR – relative risk. RRs significant to  $P < 0.01$  (\*\*\*),  $P < 0.05$  (\*\*), and  $P < 0.10$  (\*).

- Model 1 adjusts for age, sex, and birth country.
- Model 2 additionally adjusts for education level, being employed, and disposable income.
- Model 3 further adjusts for housing type, number of working age individuals in household, and population density at the DeSO level.
- Source:* Authors' calculations were based upon Swedish registers from the “Ageing Well” project.
